# Supplementary material for: Use of Patient-Derived Organoids as a Treatment Selection Model for Colorectal Cancer: A Narrative Review
Source: MDPI journal article supplement (doi:10.3390/cancers14041069), 2022-02-20
Supplement: s1 [file s1]

# Use of Patient-Derived Organoids as a Treatment Selection Model for Colorectal Cancer: A Narrative Review

Sara Furbo, Paulo César Martins Urbano, Hans Henrik Raskov, Jesper Thorvald Troelsen, Anne-Marie Kanstrup Fiehn and Ismail Gögenur

**Table S1.** Reagents and solutions needed for organoid medium.

| Reagents and solutions                                  |
|---------------------------------------------------------|
| DMEM/F12                                                |
| Ultraglutamine I                                        |
| HEPES buffer                                            |
| Penicillin                                              |
| Streptomycin                                            |
| Noggin                                                  |
| R-Spondin1                                              |
| B27 without vitamin A                                   |
| N-acetylcysteine                                        |
| Nicotinamide                                            |
| Human EGF                                               |
| ALK5 inhibitor (TGF- $\beta$ Type I Receptor inhibitor) |
| P38 inhibitor                                           |
| Prostaglandin E2                                        |
| WNT                                                     |
